# Supplementary material for: Gene Expression and Silencing Studies in Phytophthora infestans Reveal Infection-Specific Nutrient Transporters and a Role for the Nitrate Reductase Pathway in Plant Pathogenesis
Source: PubMed Central journal article supplement (PMC5176271; doi:10.1371/journal.ppat.1006097), 2016-12-09
Supplement: ppat.1006097.s003.pdf [file ppat.1006097.s003.pdf]

**Table S3.** Primers for RT-qPCR

| Gene                      | Forward                   | Reverse                    |
|---------------------------|---------------------------|----------------------------|
| PITG_13011 (NRT)          | GGCCGAATCGGAGTGCAGTTTAT   | GCTGCGGCAACAAAGATACTCAA    |
| PITG_13012 (NR)           | CGTACTACGGAGACGGCAATTT    | CCATGGCAAAGTTAAGTCGACTCTTA |
| PITG_13013 (NiR)          | GTCACCTGAACTCCTGGCTCAGTT  | GGACACATGTTCTGGGTGGCATA    |
| PITG_13010 (flanking NRT) | GGCAAACCACCACTACGACATGAAA | CTGCTGCCACAACGAAGCTCAA     |
| PITG_13014 (flanking NiR) | CGAGCCCAATGAGGCGTACACTAT  | GCAGCAGCAGTACCGTAACCTTAAA  |
| PITG_17803 (AAAP1)        | ACACGACGAGCTGCTTGTT       | CTGCTGCGGCTCGGTTTC         |
| PITG_20230 (AAAP2)        | ATCACCACGAACTGCATCC       | GGGGCTGAGAGAATGAGTT        |
| PITG_12808 (AAAP3)        | TGAACACTTCCTCGACCTC       | TCGAAGCTGTTCAACGGCT        |
| PITG_000375 (Hmp1)        | CAAGCTCAAGGAGGTCAAGG      | CAAGCGAGCATGAAGAACAA       |
| PITG_16866 (Npp1)         | GGAGTCGCTGCCTAAGGAC       | ATTCAGCAGACGGCAAATG        |
| PITG_18578 (Cdc14)        | CATGGAGGCTATCGAGAGTA      | CCTGAGAGTTCAAGACAATCC      |
| PITG_11766 (RiboS3A)      | TAAGACGACGGACGGATAC       | AGGCACAACTTCAGGAATAG       |
| PITG_14374 (Avr3a)        | GGGACGCCAGCTCACTACATA     | TCCGCCAGCTTATCATTACCCA     |
